# Supplementary material for: Robust fabrication of μ-patterns with tunable and durable wetting properties: hydrophilic to ultrahydrophobic via a vacuum process
Source: Royal Society of Chemistry journal article supplement (doi:10.1039/c7ta01385j), 2017-01-01
Supplement: c7ta01385j1.pdf [file c7ta01385j1.pdf]

## Robust Fabrication of $\mu$ -patterns with tunable wetting properties: hydrophilic to ultrahydrophobic by vacuum process

R. Jagdheesh<sup>a\*</sup>, M. Diaz<sup>a</sup>, S. Marimuthu<sup>b</sup> and J.L. Ocana<sup>a</sup>

<sup>a</sup>Centro Láser, Universidad Politécnica de Madrid, Ctra. de Valencia  
Km, 7.3, 28031, Madrid, Spain.

<sup>b</sup>Loughborough University, Loughborough, LE11 3TU, UK

**Corresponding author:** R. Jagdheesh: email: r.jagdheesh@upm.es; rjagdheesh@gmail.com

### 1. XPS spectra for different P value, $\mu$ -pillar structure.

The XPS spectra recorded for different P value has been given below.

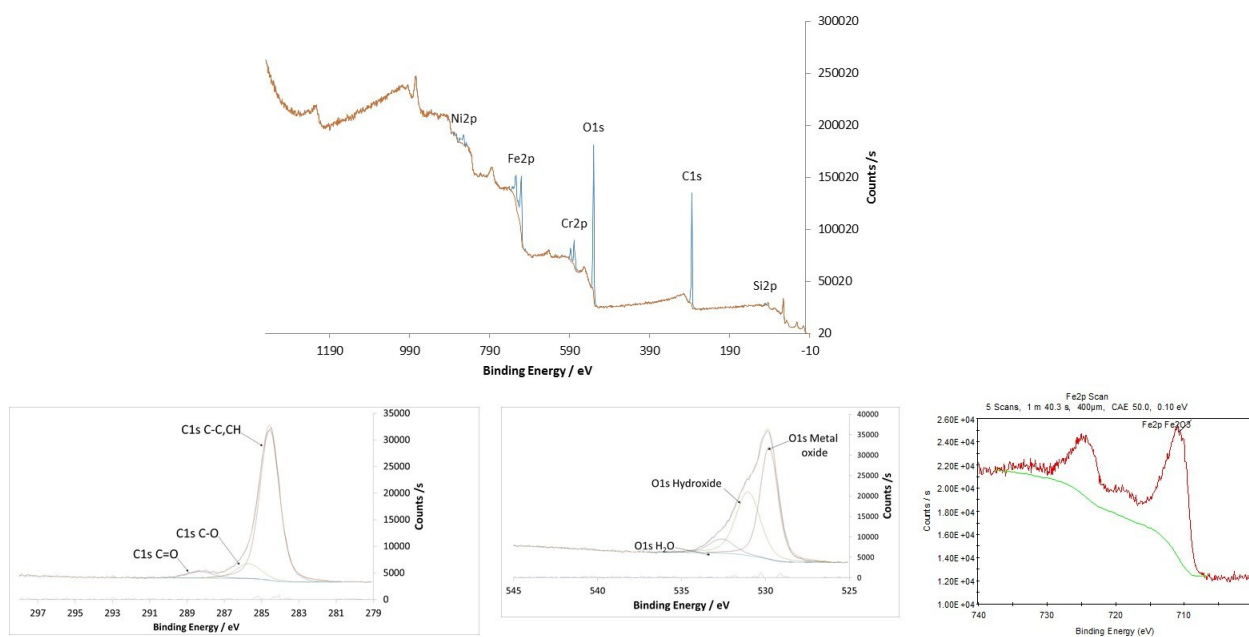

**Figure S1.** XPS survey and high-resolution C1s, Fe 2p, and O 1s spectra for AISI 304, P: 20  $\mu$ -pillar

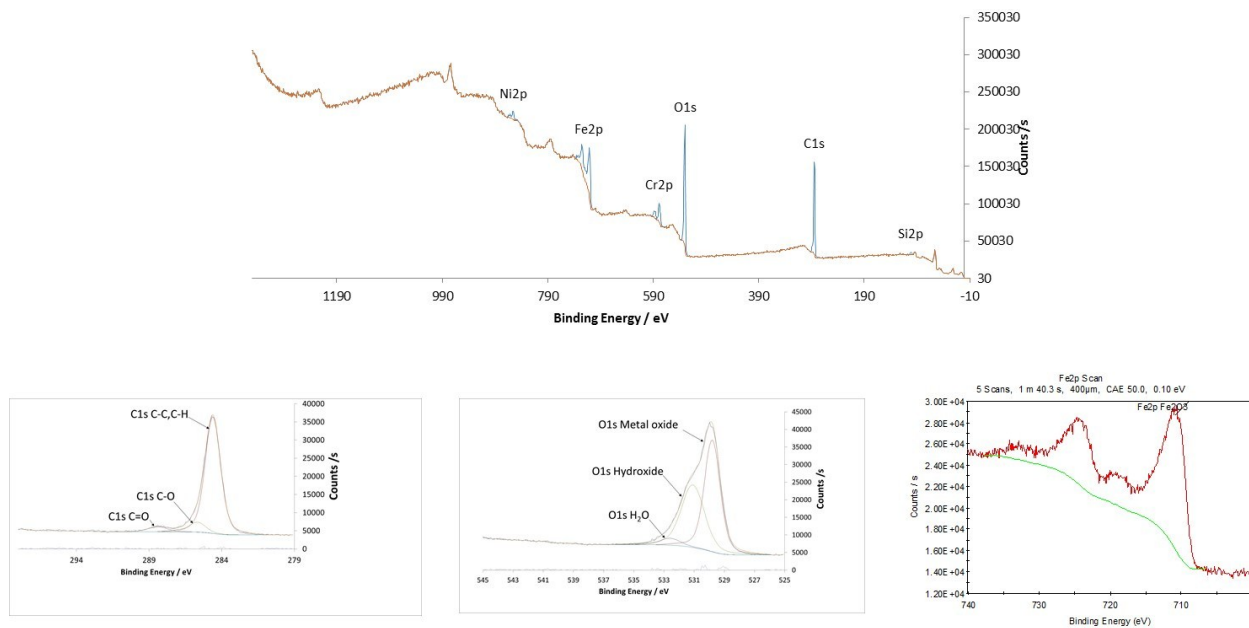

**Figure S2.** XPS survey and high-resolution C<sub>1s</sub>, Fe 2p, and O 1s spectra for AISI 304, P: 25 μ-pillar

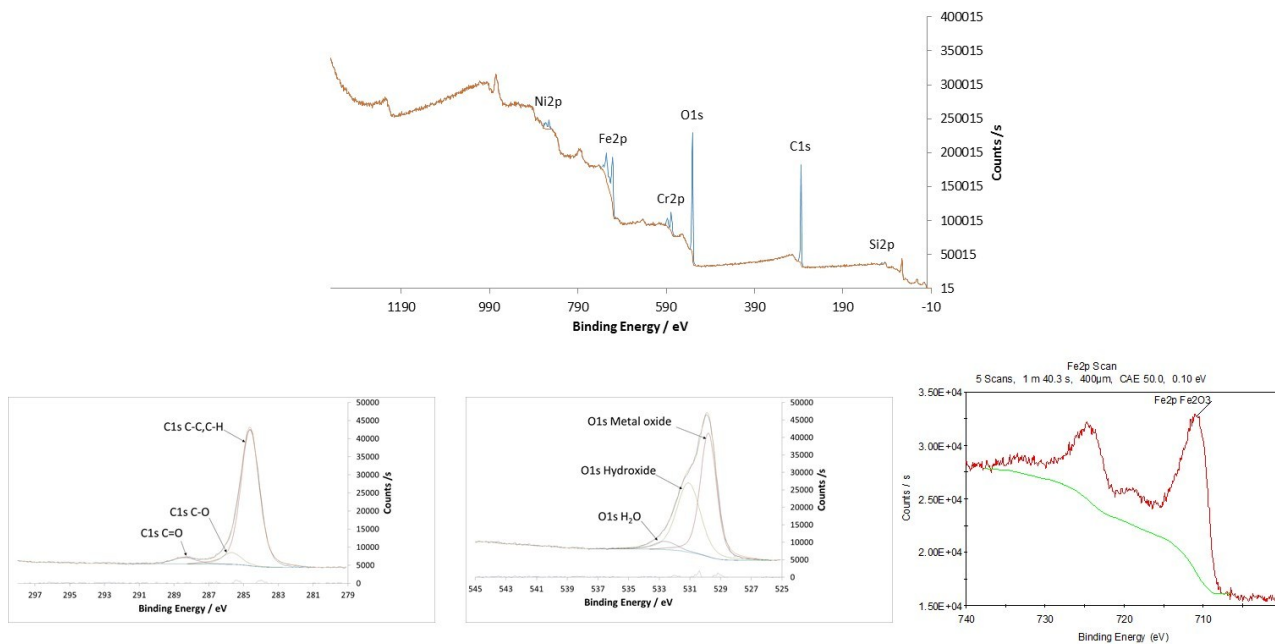

**Figure S3.** XPS survey and high-resolution C<sub>1s</sub>, Fe 2p, and O 1s spectra for AISI 304, P: 30 μ-pillar

Figure S4 is a water droplet sitting on the laser patterned region. This photograph has been recorded with Macro lens connected with Nikon SLR camera. This image clearly show the small volume of air trapped in the interface between water and solid surface. The presence of air pockets at the interface, largely reduces the fractional solid surface in contact with the liquid (water).

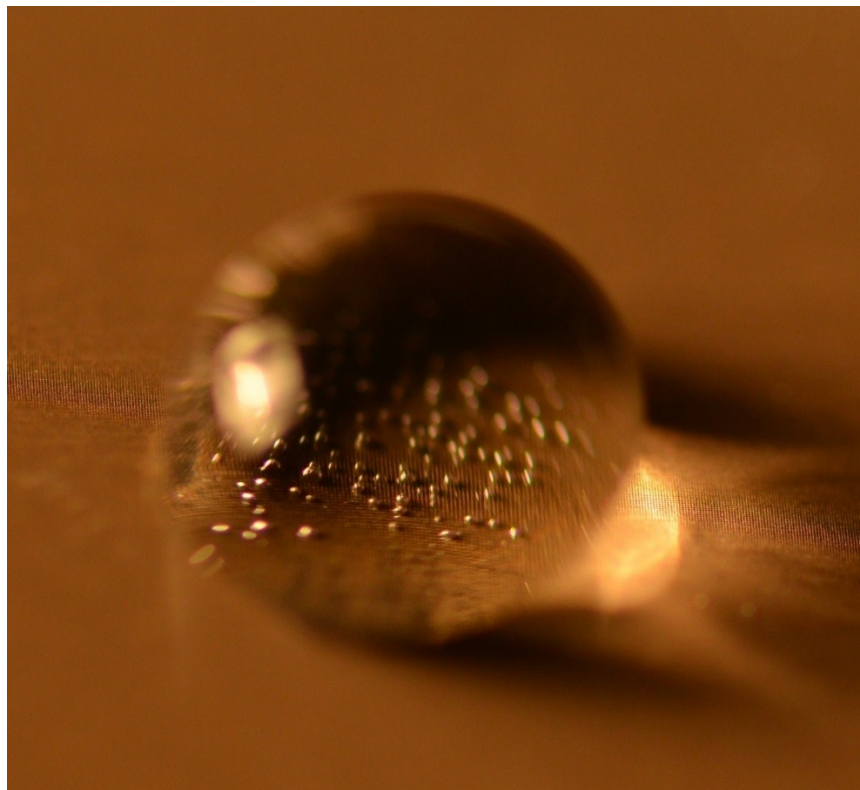

**Figure S4.** Droplet sitting on the laser patterned region with air bubbles at the solid-liquid interface.

## 2. Durability and consistency

**Table S.I. Wetting property measurement for sample vacuum processed for 30 min. And 15 min. for all P values.**

| <b>Days</b> | <b>Samples stored for 30 min. in high vacuum CA (°)</b> | <b>Samples stored for 15 min. in high vacuum. CA (°)</b> |
|-------------|---------------------------------------------------------|----------------------------------------------------------|
| 15          | 180                                                     | 180                                                      |
| 30          | 180                                                     | 180                                                      |
| 45          | 180                                                     | 180                                                      |
| 60          | 180                                                     | 180                                                      |
| 120         | 180                                                     | 180                                                      |
| 160         | 180                                                     | 180                                                      |
| 200         | 180                                                     | 180                                                      |

Table S.I show the wetting property measured periodically upto 200 days to check the consistency and durability of the vacuum processed samples. The static contact angle (SCA) measurements were measured with droplet volume 8  $\mu\text{L}$ . primarily, the samples vacuum processed with 15 min. showed CA value in range of 160-170  $^\circ$  has been increased to 180 $^\circ$ . This is due to aging factor, which has been well established phenomena. All the samples irrespective of the P value shows a consistency and durability of wetting properties with respect to time. Therefore, it is well proven that, the transformation of wetting property is permanent as long as the samples are physically manipulated (eg. plasma cleaning).
